# Supplementary material for: Nets, spray or both? The effectiveness of insecticide-treated nets and indoor residual spraying in reducing malaria morbidity and child mortality in sub-Saharan Africa
Source: PubMed Central journal article supplement (PMC3610288; doi:10.1186/1475-2875-12-62), 2013-02-13
Supplement: 1475-2875-12-62-S3.pdf [file 1475-2875-12-62-S3.pdf]

**Additional file 3.** Surveys included in the analysis for child mortality. ITN and IRS coverage estimates are at the national level. Percentage of households by season and transmission area is based on the number of households included for each sub-analysis.

| Country      | Survey | Year of Survey | No. of Households Sampled | % Households Surveyed by Season |      | % Households in Transmission Area |      |      | % ITN Ownership | % IRS | Survival Analysis  |                  |
|--------------|--------|----------------|---------------------------|---------------------------------|------|-----------------------------------|------|------|-----------------|-------|--------------------|------------------|
|              |        |                |                           | Wet                             | Dry  | High                              | Med. | Low  |                 |       | Total No. Children | No. Child Deaths |
| Angola       | MIS    | 2006-2007      | 2,599                     | 8.5                             | 91.6 | 45.5                              | 52.6 | 1.9  | 26.6            | 3.8   | 2,560              | 34               |
| Burundi      | DHS    | 2010-2011      | 8,596                     | 31.3                            | 68.7 | 1.1                               | 75.1 | 23.8 | 52.0            | 0.3   | 8,125              | 88               |
| Burkina Faso | DHS    | 2010-2011      | 14,424                    | 68.7                            | 31.3 | 93.8                              | 0.0  | 6.2  | 56.9            | 0.9   | 15,237             | 220              |
| Cameroon     | DHS    | 2011           | 14,214                    | 65.5                            | 35.5 | 74.7                              | 24.2 | 1.1  | 36.4            | 2.3   | 11,286             | 182              |
| Ethiopia     | DHS    | 2005           | 13,721                    | 25.1                            | 74.9 | 0.0                               | 44.6 | 55.4 | 3.5             | 8.4   | 13,739             | 363              |
| Kenya        | DHS    | 2008-2009      | 9,057                     | 38.4                            | 61.6 | 3.2                               | 47.3 | 49.5 | 48.9            | 6.9   | 6,142              | 50               |
| Malawi       | DHS    | 2009-2010      | 24,825                    | 0.6                             | 99.4 | 56.4                              | 43.6 | 0.0  | 55.0            | 2.8   | 20,686             | 277              |
| Namibia      | DHS    | 2006-2007      | 9,200                     | 44.8                            | 55.2 | 0.0                               | 59.0 | 41.0 | 15.6            | 20.4  | 5,009              | 93               |
| Rwanda       | DHS    | 2007-2008      | 7,377                     | 7.8                             | 92.2 | 3.2                               | 52.5 | 44.3 | 50.5            | 6.2   | 5,626              | 42               |
| Senegal      | MIS    | 2008-2009      | 9,291                     | 18.1                            | 81.9 | 0.0                               | 96.5 | 3.5  | 57.5            | 10.5  | 15,653             | 141              |
| Senegal      | DHS    | 2010-2011      | 7,748                     | 7.8                             | 92.2 | 2.0                               | 64.9 | 33.1 | 65.0            | 4.3   | 12,260             | 80               |
| Uganda       | DHS    | 2006           | 8,870                     | 82.4                            | 17.6 | 35.5                              | 59.7 | 4.8  | 19.1            | 6.7   | 7,319              | 122              |
| Uganda       | DHS    | 2011           | 9,033                     | 82.3                            | 17.7 | 55.1                              | 40.1 | 4.8  | 59.8            | 7.2   | 7,793              | 77               |
| Zambia       | DHS    | 2007           | 7,164                     | 6.2                             | 93.8 | 0.2                               | 99.8 | 0.0  | 54.2            | 15.6  | 6,248              | 84               |
| Zimbabwe     | DHS    | 2005-2006      | 9,285                     | 14.7                            | 85.3 | 0.0                               | 24.4 | 75.6 | 6.9             | 15.1  | 5,224              | 56               |
| Zimbabwe     | DHS    | 2010-2011      | 9,465                     | 21.9                            | 78.1 | 0.4                               | 43.8 | 55.8 | 25.8            | 18.8  | 5,278              | 44               |
