# Supplementary material for: Nets, spray or both? The effectiveness of insecticide-treated nets and indoor residual spraying in reducing malaria morbidity and child mortality in sub-Saharan Africa
Source: PubMed Central journal article supplement (PMC3610288; doi:10.1186/1475-2875-12-62), 2013-02-13
Supplement: 1475-2875-12-62-S6.pdf [file 1475-2875-12-62-S6.pdf]

**Additional file 6.** Logistic regression results for parasitaemia by malaria transmission risk.

| Covariate                  |             | High Transmission |          |              | Medium Transmission |          |              | Low Transmission |          |              |
|----------------------------|-------------|-------------------|----------|--------------|---------------------|----------|--------------|------------------|----------|--------------|
|                            |             | OR                | <i>p</i> | 95% CI       | OR                  | <i>p</i> | 95% CI       | OR               | <i>p</i> | 95% CI       |
| ITN only                   |             | 0.90              | 0.004    | (0.84, 0.97) | 0.87                | 0.013    | (0.78, 0.97) | 0.96             | 0.883    | (0.62, 1.50) |
| IRS only                   |             | 0.91              | 0.604    | (0.64, 1.30) | 0.80                | 0.022    | (0.66, 0.97) | 0.34             | 0.018    | (0.14, 0.83) |
| ITN and IRS                |             | 0.69              | 0.003    | (0.53, 0.89) | 0.47                | 0.000    | (0.33, 0.63) | 0.67             | 0.205    | (0.30, 1.33) |
| Seasonality                | Dry         | 1.00              | -        | -            | 1.00                | -        | -            | 1.00             | -        | -            |
|                            | Wet         | 1.52              | 0.000    | (1.40, 1.66) | 1.93                | 0.000    | (1.74, 2.15) | 3.46             | 0.002    | (1.57, 7.64) |
| Child's age<br>(in months) | 1 to 11     | 1.00              | -        | -            | 1.00                | -        | -            | 1.00             | -        | -            |
|                            | 12 to 23    | 1.35              | 0.000    | (1.20, 1.52) | 1.63                | 0.000    | (1.36, 1.95) | 1.12             | 0.705    | (0.62, 2.04) |
|                            | 24 to 35    | 1.92              | 0.000    | (1.71, 2.16) | 2.37                | 0.000    | (1.98, 2.84) | 1.94             | 0.026    | (1.08, 3.49) |
|                            | 36 to 47    | 2.15              | 0.000    | (1.91, 2.43) | 2.74                | 0.000    | (2.29, 3.27) | 2.06             | 0.011    | (1.18, 3.57) |
|                            | 48 to 59    | 2.42              | 0.000    | (2.15, 2.74) | 3.06                | 0.000    | (2.56, 3.66) | 1.65             | 0.091    | (0.82, 2.95) |
| Maternal<br>Education      | None        | 1.00              | -        | -            | 1.00                | -        | -            | 1.00             | -        | -            |
|                            | Primary     | 0.78              | 0.000    | (0.71, 0.84) | 0.98                | 0.758    | (0.88, 1.10) | 1.22             | 0.393    | (0.77, 1.94) |
|                            | ≥ Secondary | 0.64              | 0.000    | (0.57, 0.72) | 0.69                | 0.000    | (0.58, 0.81) | 0.56             | 0.134    | (0.26, 1.20) |
| Household<br>wealth        | Poorest     | 1.00              | -        | -            | 1.00                | -        | -            | 1.00             | -        | -            |
|                            | Quintile 2  | 1.02              | 0.748    | (0.92, 1.12) | 0.90                | 0.085    | (0.79, 1.02) | 0.93             | 0.754    | (0.49, 1.46) |
|                            | Quintile 3  | 0.91              | 0.055    | (0.82, 1.00) | 0.87                | 0.026    | (0.76, 0.98) | 1.11             | 0.669    | (0.69, 1.79) |
|                            | Quintile 4  | 0.77              | 0.000    | (0.69, 0.86) | 0.55                | 0.000    | (0.48, 0.64) | 0.62             | 0.077    | (0.36, 1.05) |
|                            | Richest     | 0.48              | 0.000    | (0.42, 0.56) | 0.25                | 0.000    | (0.21, 0.31) | 0.20             | 0.000    | (0.09, 0.45) |
| Urban<br>residence         | Rural       | 1.00              | -        | -            | 1.00                | -        | -            | 1.00             | -        | -            |
|                            | Urban       | 0.45              | 0.000    | (0.42, 0.56) | 0.77                | 0.000    | (0.69, 0.85) | 0.58             | 0.020    | (0.37, 0.92) |
