# Supplementary material for: Nets, spray or both? The effectiveness of insecticide-treated nets and indoor residual spraying in reducing malaria morbidity and child mortality in sub-Saharan Africa
Source: PubMed Central journal article supplement (PMC3610288; doi:10.1186/1475-2875-12-62), 2013-02-13
Supplement: 1475-2875-12-62-S7.pdf [file 1475-2875-12-62-S7.pdf]

## Additional file 7. Logistic regression results for parasitaemia by urbanicity.

| Covariate               |             | Rural |          |              | Urban |          |              |
|-------------------------|-------------|-------|----------|--------------|-------|----------|--------------|
|                         |             | OR    | <i>p</i> | 95% CI       | OR    | <i>p</i> | 95% CI       |
| ITN only                |             | 0.93  | 0.044    | (0.87, 1.00) | 0.78  | 0.000    | (0.69, 0.88) |
| IRS only                |             | 0.56  | 0.000    | (0.45, 0.69) | 0.76  | 0.021    | (0.60, 0.96) |
| ITN and IRS             |             | 0.43  | 0.000    | (0.35, 0.52) | 0.61  | 0.010    | (0.39, 0.90) |
| Seasonality             | Dry         | 1.00  | -        | -            | 1.00  | -        | -            |
|                         | Wet         | 1.50  | 0.000    | (1.39, 1.61) | 1.98  | 0.000    | (1.74, 2.24) |
| Child's age (in months) | 1 to 11     | 1.00  | -        | -            | 1.00  | -        | -            |
|                         | 12 to 23    | 1.44  | 0.000    | (1.29, 1.62) | 1.46  | 0.000    | (1.21, 1.75) |
|                         | 24 to 35    | 2.07  | 0.000    | (1.85, 2.32) | 2.19  | 0.000    | (1.82, 2.63) |
|                         | 36 to 47    | 2.42  | 0.000    | (2.16, 2.71) | 2.32  | 0.000    | (1.93, 2.79) |
|                         | 48 to 59    | 2.63  | 0.000    | (2.35, 2.95) | 2.71  | 0.000    | (2.26, 3.26) |
| Maternal Education      | None        | 1.00  | -        | -            | 1.00  | -        | -            |
|                         | Primary     | 0.87  | 0.000    | (0.81, 0.94) | 0.93  | 0.293    | (0.82, 1.06) |
|                         | ≥ Secondary | 0.70  | 0.000    | (0.62, 0.78) | 0.65  | 0.000    | (0.30, 0.45) |
| Household wealth        | Poorest     | 1.00  | -        | -            | 1.00  | -        | -            |
|                         | Quintile 2  | 0.95  | 0.213    | (0.88, 1.03) | 1.03  | 0.748    | (0.86, 1.23) |
|                         | Quintile 3  | 0.89  | 0.010    | (0.82, 0.97) | 0.86  | 0.082    | (0.73, 1.02) |
|                         | Quintile 4  | 0.71  | 0.000    | (0.64, 0.79) | 0.69  | 0.000    | (0.57, 0.82) |
|                         | Richest     | 0.46  | 0.000    | (0.40, 0.53) | 0.37  | 0.000    | (0.30, 0.45) |
| Transmission Risk       | Low         | 0.60  | 0.000    | (0.52, 0.70) | 0.58  | 0.000    | (0.43, 0.78) |
|                         | Medium      | 1.00  | -        | (3.88, 7.41) | 1.00  | -        | -            |
|                         | High        | 1.81  | 0.000    | (1.66, 1.96) | 1.34  | 0.000    | (1.15, 1.57) |
