# Supplementary material for: Nets, spray or both? The effectiveness of insecticide-treated nets and indoor residual spraying in reducing malaria morbidity and child mortality in sub-Saharan Africa
Source: PubMed Central journal article supplement (PMC3610288; doi:10.1186/1475-2875-12-62), 2013-02-13
Supplement: 1475-2875-12-62-S8.pdf [file 1475-2875-12-62-S8.pdf]

**Additional file 8.** Relative risk results for all-cause child mortality by malaria transmission risk.

| Covariate                    |            | High Transmission |          |              | Medium Transmission |          |              | Low Transmission |          |              |
|------------------------------|------------|-------------------|----------|--------------|---------------------|----------|--------------|------------------|----------|--------------|
|                              |            | RR                | <i>p</i> | 95% CI       | RR                  | <i>p</i> | 95% CI       | RR               | <i>p</i> | 95% CI       |
| ITN only                     |            | 0.87              | 0.113    | (0.73, 1.03) | 0.88                | 0.158    | (0.74, 1.05) | 0.89             | 0.489    | (0.63, 1.24) |
| IRS only                     |            | 0.94              | 0.919    | (0.30, 2.94) | 0.73                | 0.259    | (0.42, 1.27) | 0.90             | 0.800    | (0.40, 2.03) |
| ITN and IRS                  |            | 0.66              | 0.659    | (0.21, 1.67) | 0.72                | 0.662    | (0.38, 1.26) | 1.11             | 0.780    | (0.28, 3.12) |
| Seasonality                  | Dry        | 1.00              | -        | -            | 1.00                | -        | -            | 1.00             | -        | -            |
|                              | Wet        | 1.04              | 0.685    | (0.88, 1.22) | 1.10                | 0.242    | (0.94, 1.29) | 1.35             | 0.058    | (0.99, 1.84) |
| Child's sex                  | Male       | 1.00              | -        | -            | 1.00                | -        | -            | 1.00             | -        | -            |
|                              | Female     | 0.91              | 0.245    | (0.77, 1.07) | 1.02                | 0.755    | (0.89, 1.18) | 0.83             | 0.064    | (0.68, 1.01) |
| Birth interval               | ≥ 24 mo.   | 1.00              | -        | -            | 1.00                | -        | -            | 1.00             | -        | -            |
|                              | < 24 mo.   | 1.85              | 0.172    | (0.76, 4.47) | 3.77                | 0.000    | (2.44, 5.82) | 1.38             | 0.472    | (0.57, 3.36) |
| Birth type                   | Single     | 1.00              | -        | -            | 1.00                | -        | -            | 1.00             | -        | -            |
|                              | Multiple   | 2.65              | 0.000    | (1.96, 3.59) | 2.62                | 0.000    | (1.94, 3.54) | 2.99             | 0.000    | (1.89, 4.73) |
| Maternal age (years)         | 15-24      | 0.82              | 0.051    | (0.68, 1.00) | 0.90                | 0.210    | (0.76, 1.06) | 0.82             | 0.120    | (0.63, 1.05) |
|                              | 25-34      | 1.00              | -        | -            | 1.00                | -        | -            | 1.00             | -        | -            |
|                              | 35-44      | 1.14              | 0.234    | (0.92, 1.42) | 1.42                | 0.000    | (1.18, 1.70) | 1.33             | 0.031    | (1.03, 1.73) |
|                              | 45-49      | 0.98              | 0.941    | (0.50, 1.90) | 0.98                | 0.956    | (0.55, 1.76) | 1.58             | 0.131    | (0.87, 2.87) |
| Maternal Education           | None       | 1.00              | -        | -            | 1.00                | -        | -            | 1.00             | -        | -            |
|                              | Primary    | 0.92              | 0.337    | (0.77, 1.09) | 0.81                | 0.025    | (0.68, 0.97) | 0.82             | 0.180    | (0.61, 1.10) |
|                              | ≥Secondary | 0.64              | 0.006    | (0.46, 0.88) | 0.59                | 0.000    | (0.45, 0.78) | 0.62             | 0.014    | (0.42, 0.91) |
| No. household members        | ≤ 4        | 1.00              | -        | -            | 1.00                | -        | -            | 1.00             | -        | -            |
|                              | 5-8        | 0.62              | 0.000    | (0.51, 0.75) | 0.55                | 0.000    | (0.46, 0.65) | 0.58             | 0.000    | (0.46, 0.73) |
|                              | ≥ 9        | 0.61              | 0.000    | (0.49, 0.76) | 0.45                | 0.000    | (0.36, 0.56) | 0.37             | 0.000    | (0.26, 0.53) |
| Household wealth (quintiles) | Poorest    | 1.00              | -        | -            | 1.00                | -        | -            | 1.00             | -        | -            |
|                              | Quintile 2 | 0.85              | 0.157    | (0.67, 1.07) | 1.10                | 0.360    | (0.90, 1.33) | 1.10             | 0.525    | (0.82, 1.47) |
|                              | Quintile 3 | 0.77              | 0.035    | (0.61, 0.98) | 0.92                | 0.429    | (0.74, 1.14) | 0.96             | 0.794    | (0.71, 1.30) |
|                              | Quintile 4 | 0.86              | 0.245    | (0.67, 1.11) | 0.93                | 0.510    | (0.73, 1.17) | 0.83             | 0.295    | (0.59, 1.17) |
|                              | Richest    | 0.74              | 0.078    | (0.53, 1.04) | 0.66                | 0.013    | (0.47, 0.91) | 0.63             | 0.049    | (0.39, 1.00) |
| Urban residence              | Rural      | 1.00              | -        | -            | 1.00                | -        | -            | 1.00             | -        | -            |
|                              | Urban      | 0.88              | 0.354    | (0.67, 1.15) | 1.63                | 0.000    | (1.31, 2.03) | 1.40             | 0.047    | (1.00, 1.94) |
| PSU-level SBA                |            | 0.63              | 0.003    | (0.46, 0.85) | 0.75                | 0.099    | (0.53, 1.06) | 0.78             | 0.350    | (0.47, 1.31) |
