# Supplementary material for: Nets, spray or both? The effectiveness of insecticide-treated nets and indoor residual spraying in reducing malaria morbidity and child mortality in sub-Saharan Africa
Source: PubMed Central journal article supplement (PMC3610288; doi:10.1186/1475-2875-12-62), 2013-02-13
Supplement: 1475-2875-12-62-S9.pdf [file 1475-2875-12-62-S9.pdf]

**Additional file 9.** Relative risk results for all-cause child mortality by urbanicity.

| Covariate                    | Rural      |          |              | Urban        |          |              |              |
|------------------------------|------------|----------|--------------|--------------|----------|--------------|--------------|
|                              | RR         | <i>p</i> | 95% CI       | RR           | <i>p</i> | 95% CI       |              |
| ITN only                     | 0.90       | 0.108    | (0.79, 1.02) | 0.82         | 0.104    | (0.64, 1.04) |              |
| IRS only                     | 0.74       | 0.219    | (0.45, 1.20) | 0.94         | 0.903    | (0.39, 2.31) |              |
| ITN and IRS                  | 0.75       | 0.611    | (0.43, 1.25) | 0.60         | 0.600    | (0.19, 1.50) |              |
| Seasonality                  | Dry        | 1.00     | -            | 1.00         | -        | -            |              |
|                              | Wet        | 1.10     | 0.117        | (0.98, 1.25) | 1.20     | 0.148        | (0.94, 1.53) |
| Child's sex                  | Male       | 1.00     | -            | 1.00         | -        | -            |              |
|                              | Female     | 0.97     | 0.588        | (0.87, 1.08) | 0.82     | 0.070        | (0.67, 1.02) |
| Birth interval               | ≥ 24 mo.   | 1.00     | -            | 1.00         | -        | -            |              |
|                              | < 24 mo.   | 3.04     | 0.000        | (2.12, 4.38) | 0.48     | 0.459        | (0.07, 3.40) |
| Birth type                   | Single     | 1.00     | -            | 1.00         | -        | -            |              |
|                              | Multiple   | 2.64     | 0.000        | (2.12, 3.29) | 2.95     | 0.000        | (1.95, 4.46) |
| Maternal age (years)         | 15-24      | 0.78     | 0.000        | (0.69, 0.89) | 1.13     | 0.309        | (0.89, 1.43) |
|                              | 25-34      | 1.00     | -            | -            | 1.00     | -            | -            |
|                              | 35-44      | 1.30     | 0.000        | (1.13, 1.49) | 1.30     | 0.087        | (0.89, 1.43) |
|                              | 45-49      | 1.14     | 0.493        | (0.79, 1.65) | 0.95     | 0.931        | (0.30, 3.00) |
| Maternal Education           | None       | 1.00     | -            | 1.00         | -        | -            |              |
|                              | Primary    | 0.88     | 0.067        | (0.77, 1.01) | 0.82     | 0.155        | (0.62, 1.08) |
|                              | ≥Secondary | 0.71     | 0.003        | (0.56, 0.89) | 0.54     | 0.000        | (0.39, 0.74) |
| No. household members        | ≤ 4        | 1.00     | -            | 1.00         | -        | -            |              |
|                              | 5-8        | 0.56     | 0.000        | (0.50, 0.64) | 0.61     | 0.000        | (0.47, 0.79) |
|                              | ≥ 9        | 0.49     | 0.000        | (0.42, 0.57) | 0.44     | 0.000        | (0.32, 0.62) |
| Household wealth (quintiles) | Poorest    | 1.00     | -            | 1.00         | -        | -            |              |
|                              | Quintile 2 | 0.99     | 0.893        | (0.86, 1.14) | 0.87     | 0.558        | (0.56, 1.37) |
|                              | Quintile 3 | 0.90     | 0.167        | (0.77, 1.05) | 0.57     | 0.013        | (0.36, 0.89) |
|                              | Quintile 4 | 0.94     | 0.454        | (0.80, 1.11) | 0.59     | 0.014        | (0.38, 0.90) |
|                              | Richest    | 0.70     | 0.016        | (0.52, 0.94) | 0.52     | 0.004        | (0.33, 0.81) |
| Transmission risk            | Low        | 0.85     | 0.032        | (0.73, 0.99) | 0.74     | 0.047        | (0.55, 1.00) |
|                              | Medium     | 1.00     | -            | -            | 1.00     | -            | -            |
|                              | High       | 1.25     | 0.007        | (1.06, 1.47) | 0.87     | 0.377        | (0.63, 1.19) |
| PSU-level SBA                | 0.68       | 0.001    | (0.54, 0.85) | 0.61         | 0.063    | (0.36, 1.03) |              |
