# Supplementary material for: Nets, spray or both? The effectiveness of insecticide-treated nets and indoor residual spraying in reducing malaria morbidity and child mortality in sub-Saharan Africa
Source: Malar J. 2013 Feb 13;12:62. doi: 10.1186/1475-2875-12-62 (PMC3610288; doi:10.1186/1475-2875-12-62)
Supplement: Additional file 1 — Classifications of household intervention exposure. [file 1475-2875-12-62-S1.pdf]

**Additional file 1.** Classifications of household intervention exposure.

| <b>Intervention Category</b> | <b>Operational Definition</b>                                                                                             |
|------------------------------|---------------------------------------------------------------------------------------------------------------------------|
| <b>Control</b>               | Household neither owns 1 ITN nor has the household had its walls sprayed with insecticide in the last 12 months.          |
| <b>ITN only</b>              | Household owns $\geq 1$ ITNs, but the household has not had its walls sprayed with insecticide in the last 12 months.     |
| <b>IRS only</b>              | Household does not own $\geq 1$ ITNs, but the household has had its walls sprayed with insecticide in the last 12 months. |
| <b>ITN and IRS</b>           | Household owns $\geq 1$ ITNs and has had its walls sprayed with insecticide in the last 12 months.                        |
