# Supplementary material for: Nets, spray or both? The effectiveness of insecticide-treated nets and indoor residual spraying in reducing malaria morbidity and child mortality in sub-Saharan Africa
Source: Malar J. 2013 Feb 13;12:62. doi: 10.1186/1475-2875-12-62 (PMC3610288; doi:10.1186/1475-2875-12-62)
Supplement: Additional file 4 — Descriptive statistics for intervention coverage and health outcomes by sub-analyses (parasitaemia and child mortality) for malaria transmission risk. For intervention coverage, units of observation are children under 5 years for parasitaemia and children under 5 years who ever experienced the intervention during analysis exposure time for mortality. [file 1475-2875-12-62-S4.pdf]

**Additional file 4.** Descriptive statistics for intervention coverage and health outcomes by sub-analyses (parasitemia and child mortality) for malaria transmission risk. For intervention coverage, units of observation are children under 5 years for parasitemia and children under 5 years who ever experienced the intervention during analysis exposure time for mortality.

|                 |              | % Intervention Coverage |          |             | Health Outcomes      |            |     |
|-----------------|--------------|-------------------------|----------|-------------|----------------------|------------|-----|
| Analysis        | Level        | ITN only                | IRS only | ITN and IRS | Para. Prevalence (%) | No. Deaths |     |
| Parasitemia     | Transmission | High                    | 53.1     | 0.8         | 2.8                  | 40.4       | -   |
|                 |              | Medium                  | 38.9     | 7.4         | 9.8                  | 11.7       | -   |
|                 |              | Low                     | 31.6     | 17.7        | 17.7                 | 7.3        | -   |
| Child Mortality | Transmission | High                    | 50.5     | 2.4         | 1.8                  | -          | 590 |
|                 |              | Medium                  | 50.7     | 9.2         | 5.4                  | -          | 780 |
|                 |              | Low                     | 31.9     | 6.0         | 2.6                  | -          | 382 |
