# Supplementary material for: Nets, spray or both? The effectiveness of insecticide-treated nets and indoor residual spraying in reducing malaria morbidity and child mortality in sub-Saharan Africa
Source: Malar J. 2013 Feb 13;12:62. doi: 10.1186/1475-2875-12-62 (PMC3610288; doi:10.1186/1475-2875-12-62)
Supplement: Additional file 5 — Descriptive statistics for intervention coverage and health outcomes by sub-analyses (parasitaemia and child mortality) across urbanity. For intervention coverage, units of observation are children under 5 years for parasitaemia and children under 5 years who ever experienced the intervention during analysis exposure time for mortality. [file 1475-2875-12-62-S5.pdf]

**Additional file 5.** Descriptive statistics for intervention coverage and health outcomes by sub-analyses (parasitemia and child mortality) across urbanity. For intervention coverage, units of observation are children under 5 years for parasitemia and children under 5 years who ever experienced the intervention during analysis exposure time for mortality.

| Analysis        | Level      | % Intervention Coverage |          |             | Health Outcomes      |            |       |
|-----------------|------------|-------------------------|----------|-------------|----------------------|------------|-------|
|                 |            | ITN only                | IRS only | ITN and IRS | Para. Prevalence (%) | No. Deaths |       |
| Parasitemia     | Urbanicity | Rural                   | 46.2     | 5.9         | 9.1                  | 25.8       | -     |
|                 |            | Urban                   | 38.4     | 5.6         | 4.6                  | 15.5       | -     |
| Child Mortality | Urbanicity | Rural                   | 45.6     | 6.2         | 3.4                  | -          | 1,402 |
|                 |            | Urban                   | 48.6     | 6.7         | 4.4                  | -          | 350   |
